# Supplementary material for: A scalable, efficient, and facile ambient drying approach for preparing low shrinkage, compressive, and superporous nano-cellulose-based aerogels via a physicochemical crosslinking strategy
Source: Royal Society of Chemistry journal article supplement (doi:10.1039/d4gc05106h), 2024-12-10
Supplement: d4gc05106h1.pdf [file d4gc05106h1.pdf]

**A scalable, efficient, and facile ambient drying approach for preparing low shrinkage, compressive, and super porous nano cellulose-based aerogel via a physicochemical crosslinking strategy**

Chunxia Tang<sup>a\*</sup>, Jing Yang<sup>a</sup>, Jian Liu<sup>a</sup>, Yunshan Mao<sup>a</sup>, Shaohai Fu<sup>a</sup>

*a College of Textile Science & Engineering, Jiangnan University, 1800 Lihu Avenue, Wuxi, Jiangsu 214122, China*

**Corresponding author:**

**Dr. Chunxia Tang**

E-mail: [chunxia.tang@jiangnan.edu.cn](mailto:chunxia.tang@jiangnan.edu.cn)

Postal address: College of Textile Science & Engineering, Jiangnan University, 1800 Lihu Avenue, Wuxi, Jiangsu 214122, China

**Other authors:**

**Jing Yang**, E-mail: [6223014002@stu.jiangnan.edu.cn](mailto:6223014002@stu.jiangnan.edu.cn)

Postal address: College of Textile Science & Engineering, Jiangnan University, 1800 Lihu Avenue, Wuxi, Jiangsu 214122, China

**Jian Liu**, E-mail: [15047641128@163.com](mailto:15047641128@163.com)

Postal address: College of Textile Science & Engineering, Jiangnan University, 1800 Lihu Avenue, Wuxi, Jiangsu 214122, China

**Yunshan Mao**, E-mail: [mys991213@163.com](mailto:mys991213@163.com)

Postal address: College of Textile Science & Engineering, Jiangnan University, 1800 Lihu Avenue, Wuxi, Jiangsu 214122, China

**Shaohai Fu**, E-mail: [shaohaifu@hotmail.com](mailto:shaohaifu@hotmail.com)

Postal address: College of Textile Science & Engineering, Jiangnan University, 1800 Lihu Avenue, Wuxi, Jiangsu 214122, China

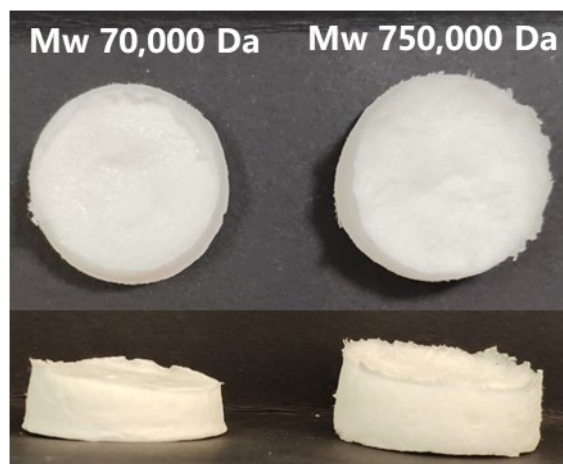

**Figure S1.** The digital photos of BGP1.0-2C aerogels prepared by PEI with Mws of 70,000 Da and 750,000 Da.

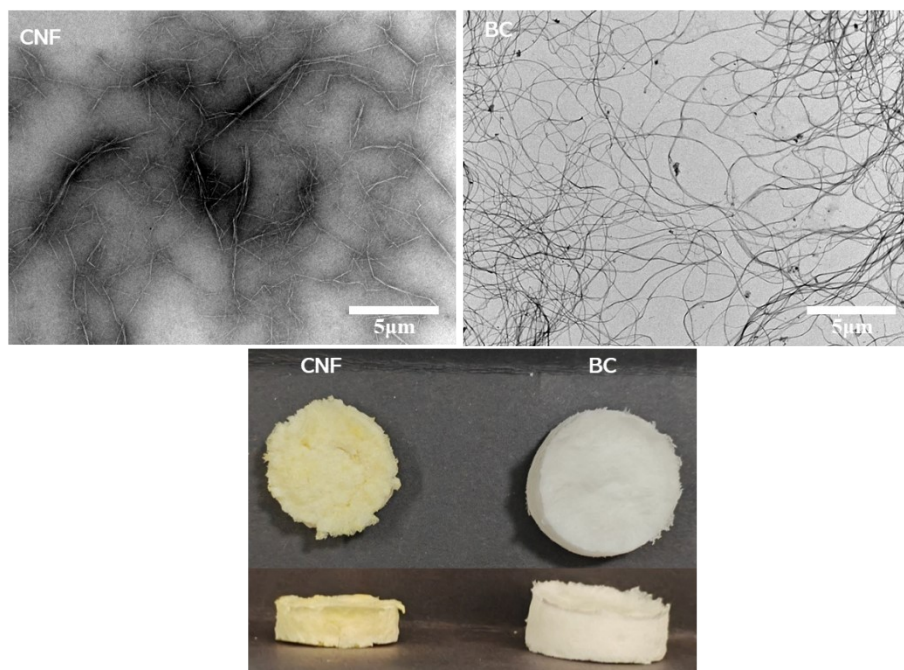

**Figure S2.** The TEM images of cellulose nanofibers with an average  $<10\ \mu\text{m}$  (TEMPO-Oxidized cellulose nanofibrils) and  $>20\ \mu\text{m}$  (Bacterial nanocellulose). The digital photos of aerogels prepared by cellulose nanofibers with different lengths.

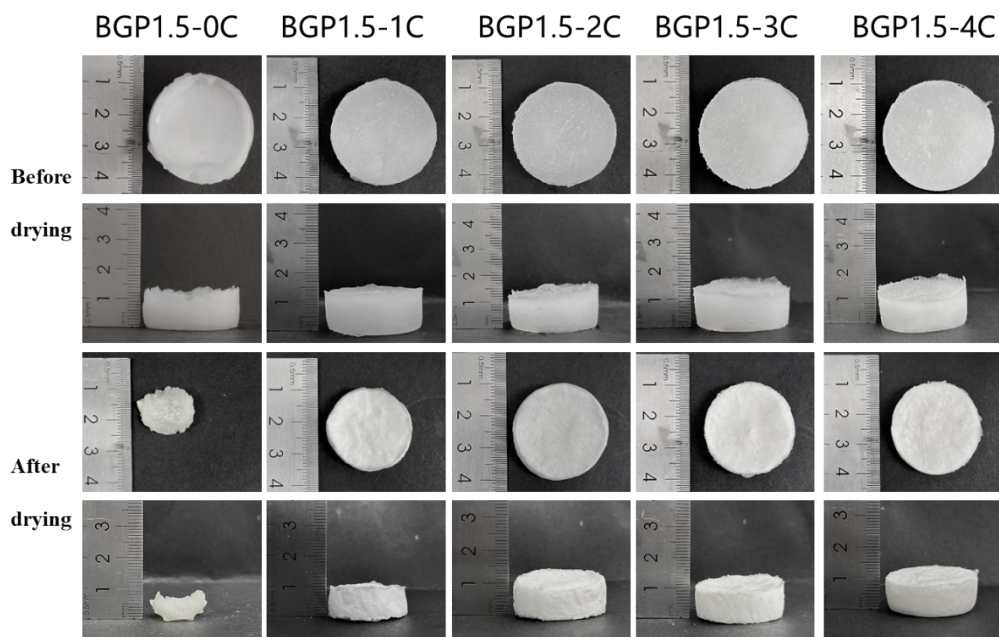

**Figure S3.** The digital photos of BGP1.5-xC gels before and after ambient drying.

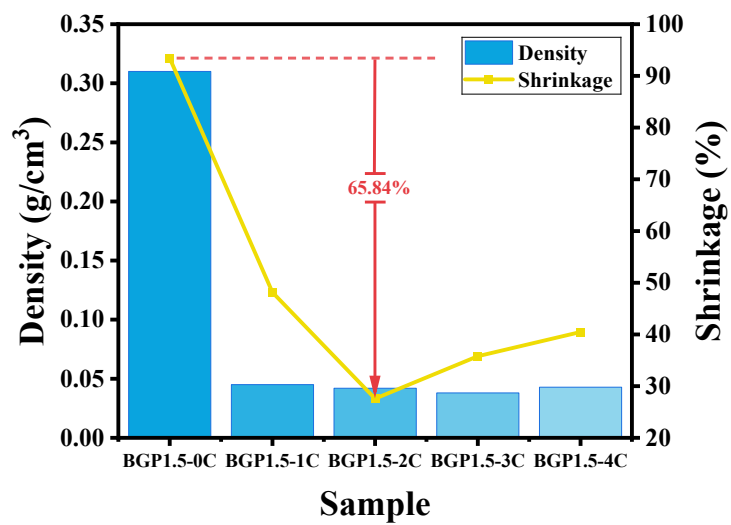

**Figure S4.** The bulk density and volume SR of BGP1.5-xC aerogels.

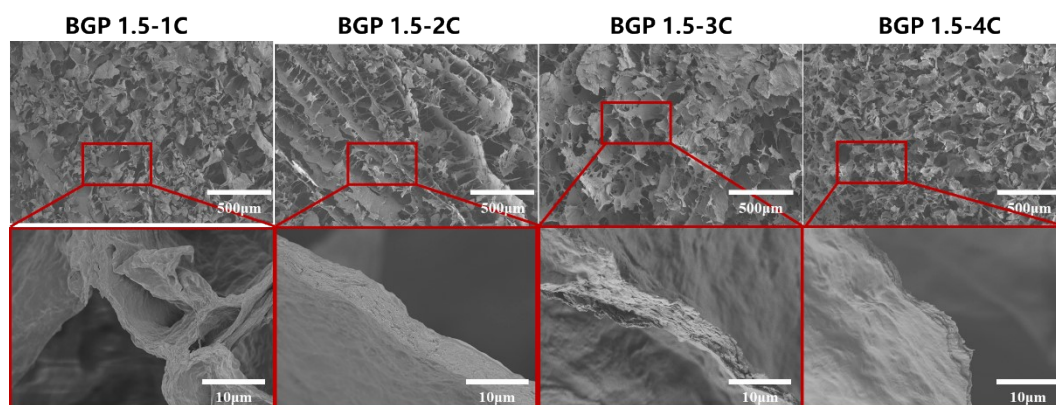

**Figure S5.** SEM images of BGP1.5-xC aerogels at different magnifications.

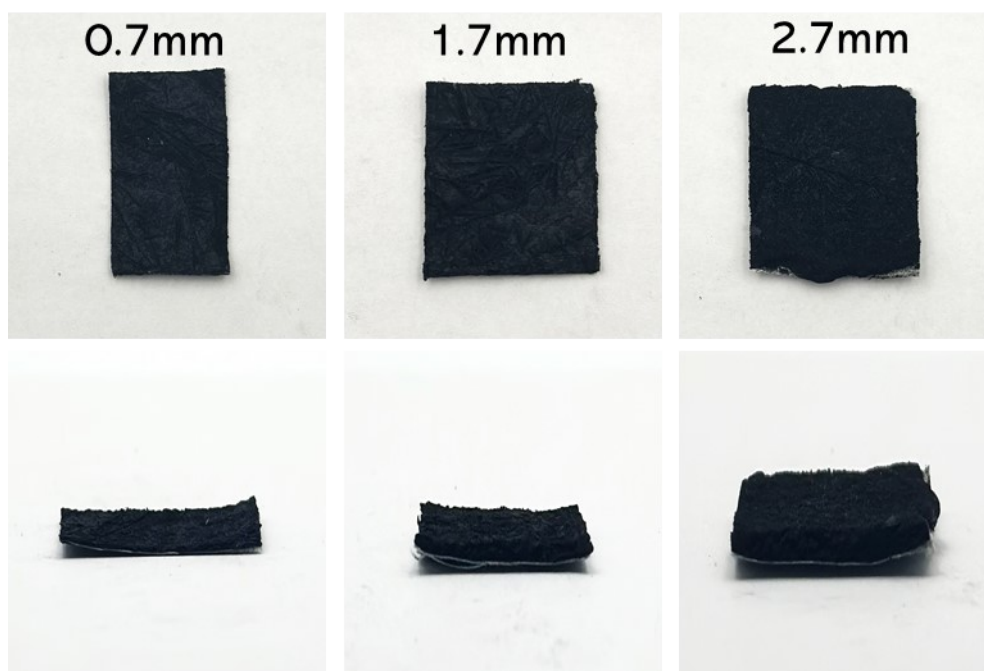

**Figure S6.** Digital photos of BGP-MXene aerogel with different thickness functionalized fabrics.

**Table S1.** Langmuir and Freundlich adsorption constants of BGP for Cr(VI) adsorption

| Isotherm models | Parameters                       |        |
|-----------------|----------------------------------|--------|
| Langmuir        | $q_m$ (mg/g)                     | 426.31 |
|                 | $K_L$ (L/mg)                     | 0.60   |
|                 | $R^2$                            | 0.95   |
| Freundlich      | $K_F$ (mg/g/mg/L) <sup>1/n</sup> | 175.10 |
|                 | n                                | 4.81   |
|                 | $R^2$                            | 0.88   |

**Table S2.** The parameters of pseudo-first-order and pseudo-second-order kinetic models for Cr(VI) adsorption onto BGP.

|     | PFO       |       |       | PSO       |                       |       |
|-----|-----------|-------|-------|-----------|-----------------------|-------|
|     | Qe (mg/g) | $K_1$ | $R^2$ | Qe (mg/g) | $K_2$                 | $R^2$ |
| BGP | 328.71    | 0.065 | 0.94  | 342.17    | $2.86 \times 10^{-4}$ | 0.99  |

**Table S3.** The parameters of intra-particle diffusion model for Cr(VI) adsorption onto BGP.

|     | Intra-particle diffusion model |            |            |       |        |        |
|-----|--------------------------------|------------|------------|-------|--------|--------|
|     | $K_{id,1}$                     | $K_{id,2}$ | $K_{id,3}$ | $C_1$ | $C_2$  | $C_3$  |
| BGP | 54.89                          | 16.12      | 1.22       | 2.32  | 138.98 | 302.89 |
